# Supplementary material
Source: publisher site journal article supplement (https://www.dovepress.com/article/supplementary_file/605498/605498_Table%20S1_1.docx)
Supplement: Supplementary file 1 [file 605498_Table%20S1_1.docx]

**Table S1.** Search strategy for PubMed.

| **Database search strategy** |  |
| --- | --- |
| **#1** | **"heart failure"[Mesh]** |
| **#2** | **"cardiac remodeling"[Mesh]** |
| **#3** | **"heart failure"[tiab] OR "cardiac remodeling"[tiab] OR "HF"[tiab]** |
| **#4** | **#1 OR #2 OR #3** |
| **#5** | **"metabolomics"[Mesh]** |
| **#6** | **"metabolomics"[tiab] OR "metabonomics"[tiab] OR "metabolic profiling"[tiab]** |
| **#7** | **"LC-MS"[tiab] OR "liquid chromatography-mass spectrometry"[tiab]** |
| **#8** | **"NMR"[tiab] OR "nuclear magnetic resonance"[tiab]** |
| **#9** | **#5 OR #6 OR #7 OR #8** |
| **#10** | **"traditional Chinese medicine"[Mesh]** |
| **#11** | **"traditional Chinese medicine"[tiab] OR "TCM"[tiab] OR "TCM formula"[tiab] OR "natural compound"[tiab]** |
| **#12** | **#10 OR #11** |
| **#13** | **#4 AND #9 AND #12** |
